# Supplementary material for: New Schiff base chromophores composed of salicylaldehyde and naphthalimide derivatives for ion sensor applications
Source: Royal Society of Chemistry journal article supplement (doi:10.1039/c9ay01035a), 2019-01-01
Supplement: c9ay01035a1.pdf [file c9ay01035a1.pdf]

# **New Schiff base chromophores composed of salicylaldehyde and naphthalimide derivatives for ion sensor application**

Han Yan, Kailiang Zhong, Yun Lu\*

Key Laboratory of High Performance Polymer Materials and Technology of MOE, State Key Laboratory of Coordination Chemistry, Collaborative Innovation Center of Chemistry for Life Sciences, Department of Polymer Science and Engineering, School of Chemistry and Chemical Engineering, Nanjing University, Nanjing 210046, China

\*Author to whom correspondence should be addressed: Nanjing University, Nanjing 210046, China, E-mail: [yunlu@nju.edu.cn](mailto:yunlu@nju.edu.cn)

# Table of Contents

|                                                          |    |
|----------------------------------------------------------|----|
| 1. Crystallographic Data for <b>NA-N</b> .               | P3 |
| 2. Atomic parameters for <b>NA-N</b> .                   | P4 |
| 3. Anisotropic displacement parameters for <b>NA-N</b> . | P7 |
| 4. NMR Spectra                                           | P8 |

**Table S1** Crystallographic Data for NA-N.

---

|                         |                                                                                                                           |
|-------------------------|---------------------------------------------------------------------------------------------------------------------------|
| <b>Formula sum</b>      | C19 H11 N3 O5                                                                                                             |
| <b>Formula weight</b>   | 361.31 g/mol                                                                                                              |
| <b>Crystal system</b>   | monoclinic                                                                                                                |
| <b>Space-group</b>      | P 1 21 1 (4)                                                                                                              |
| <b>Cell parameters</b>  | a=8.5796(8) Å b=7.6309(6) Å c=11.7149(10) Å $\beta=94.235(4)^\circ$                                                       |
| <b>Cell ratio</b>       | a/b=1.1243 b/c=0.6514 c/a=1.3654                                                                                          |
| <b>Cell volume</b>      | 764.88(11) Å <sup>3</sup>                                                                                                 |
| <b>Z</b>                | 2                                                                                                                         |
| <b>Calc. density</b>    | 1.5687 g/cm <sup>3</sup>                                                                                                  |
| <b>Meas. density</b>    |                                                                                                                           |
| <b>Melting point</b>    |                                                                                                                           |
| <b>RAll</b>             | 0.1078                                                                                                                    |
| <b>RObs</b>             |                                                                                                                           |
| <b>Pearson code</b>     | mP76                                                                                                                      |
| <b>Formula type</b>     | N3O5P11Q19                                                                                                                |
| <b>Wyckoff sequence</b> | a38                                                                                                                       |
| <b>Formula sum</b>      | C14 H11 N3 O2                                                                                                             |
| <b>Formula weight</b>   | 253.26 g/mol                                                                                                              |
| <b>Crystal system</b>   | triclinic                                                                                                                 |
| <b>Space-group</b>      | P -1 (2)                                                                                                                  |
| <b>Cell parameters</b>  | a=8.1726(7) Å b=12.0345(12) Å c=14.2401(12) Å $\alpha=110.964(3)^\circ$ $\beta=103.662(3)^\circ$ $\gamma=98.181(3)^\circ$ |
| <b>Cell ratio</b>       | a/b=0.6791 b/c=0.8451 c/a=1.7424                                                                                          |
| <b>Cell volume</b>      | 1230.5(2) Å <sup>3</sup>                                                                                                  |
| <b>Z</b>                | 4                                                                                                                         |
| <b>Calc. density</b>    | 1.36699 g/cm <sup>3</sup>                                                                                                 |
| <b>Meas. density</b>    |                                                                                                                           |
| <b>Melting point</b>    |                                                                                                                           |
| <b>RAll</b>             | 0.1254                                                                                                                    |
| <b>RObs</b>             |                                                                                                                           |
| <b>Pearson code</b>     | aP120                                                                                                                     |
| <b>Formula type</b>     | N2O3P11Q14                                                                                                                |
| <b>Wyckoff sequence</b> | i60                                                                                                                       |

---

**Table S2** Atomic parameters for NA-N.

| Atom | Ox. | Wyck. | Site | S.O.F. | x/a        | y/b       | z/c       | U [Å <sup>2</sup> ] |
|------|-----|-------|------|--------|------------|-----------|-----------|---------------------|
| C1   |     | 2a    | 1    |        | 0.4082(6)  | 0.7547(6) | 0.5731(5) |                     |
| C2   |     | 2a    | 1    |        | 0.2773(6)  | 1.0484(6) | 0.5536(4) |                     |
| C3   |     | 2a    | 1    |        | 0.3636(6)  | 1.1026(7) | 0.6621(4) |                     |
| C4   |     | 2a    | 1    |        | 0.3382(6)  | 1.2669(6) | 0.7045(5) |                     |
| H4   |     | 2a    | 1    |        | 0.26730    | 1.34450   | 0.66410   | 0.0240              |
| C5   |     | 2a    | 1    |        | 0.4176(7)  | 1.3195(8) | 0.8077(5) |                     |
| H5   |     | 2a    | 1    |        | 0.39930    | 1.43310   | 0.83720   | 0.0320              |
| C6   |     | 2a    | 1    |        | 0.5201(6)  | 1.2108(7) | 0.8663(5) |                     |
| H6   |     | 2a    | 1    |        | 0.57320    | 1.24980   | 0.93570   | 0.0290              |
| C7   |     | 2a    | 1    |        | 0.5492(6)  | 1.0398(7) | 0.8252(4) |                     |
| C8   |     | 2a    | 1    |        | 0.6550(6)  | 0.9208(7) | 0.8820(5) |                     |
| H8   |     | 2a    | 1    |        | 0.70990    | 0.95510   | 0.95180   | 0.0280              |
| C9   |     | 2a    | 1    |        | 0.6798(7)  | 0.7587(7) | 0.8392(5) |                     |
| H9   |     | 2a    | 1    |        | 0.75110    | 0.68100   | 0.87910   | 0.0310              |
| C10  |     | 2a    | 1    |        | 0.5999(6)  | 0.7057(7) | 0.7357(5) |                     |
| H10  |     | 2a    | 1    |        | 0.61830    | 0.59290   | 0.70520   | 0.0250              |
| C11  |     | 2a    | 1    |        | 0.4950(6)  | 0.8174(7) | 0.6789(4) |                     |
| C12  |     | 2a    | 1    |        | 0.4686(6)  | 0.9859(7) | 0.7208(4) |                     |
| C13  |     | 2a    | 1    |        | 0.1541(6)  | 0.6743(7) | 0.4124(5) |                     |
| H13  |     | 2a    | 1    |        | 0.15990    | 0.60020   | 0.47770   | 0.0240              |
| C14  |     | 2a    | 1    |        | 0.0516(6)  | 0.7267(6) | 0.2096(5) |                     |
| C15  |     | 2a    | 1    |        | 0.0724(5)  | 0.6170(7) | 0.3049(4) |                     |
| C16  |     | 2a    | 1    |        | 0.0093(6)  | 0.4492(7) | 0.3000(4) |                     |
| H16  |     | 2a    | 1    |        | 0.02400    | 0.37250   | 0.36380   | 0.0220              |
| C17  |     | 2a    | 1    |        | -0.0751(6) | 0.3953(7) | 0.2014(5) |                     |
| C18  |     | 2a    | 1    |        | -0.0964(6) | 0.5038(7) | 0.1059(5) |                     |
| H18  |     | 2a    | 1    |        | -0.15360   | 0.46380   | 0.03840   | 0.0280              |
| C19  |     | 2a    | 1    |        | -0.0338(6) | 0.6687(7) | 0.1106(5) |                     |
| H19  |     | 2a    | 1    |        | -0.04850   | 0.74420   | 0.04620   | 0.0290              |
| N1   |     | 2a    | 1    |        | 0.2960(5)  | 0.8709(5) | 0.5229(4) |                     |
| N2   |     | 2a    | 1    |        | 0.2176(5)  | 0.8260(6) | 0.4168(4) |                     |
| N3   |     | 2a    | 1    |        | -0.1452(5) | 0.2221(6) | 0.1981(4) |                     |
| O1   |     | 2a    | 1    |        | 0.4278(4)  | 0.6101(5) | 0.5322(3) |                     |
| O2   |     | 2a    | 1    |        | 0.1105(4)  | 0.8901(5) | 0.2073(3) |                     |
| H2A  |     | 2a    | 1    |        | 0.148(6)   | 0.904(8)  | 0.275(5)  | 0.0340              |
| O3   |     | 2a    | 1    |        | -0.1426(4) | 0.1371(5) | 0.2869(3) |                     |
| O4   |     | 2a    | 1    |        | -0.2070(5) | 0.1698(6) | 0.1056(3) |                     |
| O5   |     | 2a    | 1    |        | 0.1887(4)  | 1.1422(5) | 0.4954(3) |                     |
| Atom | Ox. | Wyck. | Site | S.O.F. | x/a        | y/b       | z/c       | U [Å <sup>2</sup> ] |
| C1A  |     | 2i    | 1    |        | 0.2879(4)  | 0.7515(3) | 0.1079(2) |                     |

|      |    |   |           |           |              |        |
|------|----|---|-----------|-----------|--------------|--------|
| C2A  | 2i | 1 | 0.3241(3) | 0.5771(3) | -0.0177(2)   |        |
| C3A  | 2i | 1 | 0.2460(3) | 0.5396(3) | 0.05398(19)  |        |
| C4A  | 2i | 1 | 0.2273(3) | 0.6436(3) | 0.1295(2)    |        |
| C5A  | 2i | 1 | 0.1539(4) | 0.6370(3) | 0.2061(2)    |        |
| H5A  | 2i | 1 | 0.14420   | 0.70880   | 0.25900      | 0.0370 |
| C6A  | 2i | 1 | 0.0954(3) | 0.5217(3) | 0.2025(2)    |        |
| H6A  | 2i | 1 | 0.04260   | 0.51390   | 0.25330      | 0.0340 |
| C7A  | 2i | 1 | 0.1119(4) | 0.4171(3) | 0.1264(2)    |        |
| H7A  | 2i | 1 | 0.06930   | 0.33900   | 0.12550      | 0.0370 |
| C8A  | 2i | 1 | 0.1900(4) | 0.4245(3) | 0.0510(2)    |        |
| H8A  | 2i | 1 | 0.20410   | 0.35320   | -0.00030     | 0.0320 |
| C9A  | 2i | 1 | 0.3940(4) | 0.7763(3) | -0.03585(19) |        |
| C10A | 2i | 1 | 0.5958(4) | 0.8599(3) | -0.0909(2)   |        |
| C11A | 2i | 1 | 0.4712(4) | 0.9012(3) | -0.1432(2)   |        |
| H11A | 2i | 1 | 0.49930   | 0.94570   | -0.18290     | 0.0340 |
| C12A | 2i | 1 | 0.3047(4) | 0.8772(3) | -0.1371(2)   |        |
| C13A | 2i | 1 | 0.7794(4) | 0.8843(3) | -0.0939(2)   |        |
| H13A | 2i | 1 | 0.85470   | 0.86740   | -0.03870     | 0.0620 |
| H13B | 2i | 1 | 0.81920   | 0.97060   | -0.08160     | 0.0620 |
| H13C | 2i | 1 | 0.78410   | 0.83110   | -0.16330     | 0.0620 |
| C14A | 2i | 1 | 0.1626(4) | 0.9211(3) | -0.1891(2)   |        |
| H14A | 2i | 1 | 0.05350   | 0.85700   | -0.21910     | 0.0610 |
| H14B | 2i | 1 | 0.19190   | 0.93960   | -0.24570     | 0.0610 |
| H14C | 2i | 1 | 0.14890   | 0.99550   | -0.13670     | 0.0610 |
| C1B  | 2i | 1 | 0.9176(4) | 0.3537(3) | 0.4149(2)    |        |
| C2B  | 2i | 1 | 0.7271(4) | 0.2676(3) | 0.4832(2)    |        |
| C3B  | 2i | 1 | 0.6351(3) | 0.3322(3) | 0.42465(19)  |        |
| C4B  | 2i | 1 | 0.7483(3) | 0.3823(3) | 0.38329(19)  |        |
| C5B  | 2i | 1 | 0.6971(4) | 0.4469(3) | 0.3237(2)    |        |
| H5B  | 2i | 1 | 0.77520   | 0.48180   | 0.29590      | 0.0340 |
| C6B  | 2i | 1 | 0.5283(4) | 0.4591(3) | 0.3057(2)    |        |
| H6B  | 2i | 1 | 0.48890   | 0.50200   | 0.26380      | 0.0380 |
| C7B  | 2i | 1 | 0.4147(4) | 0.4098(3) | 0.3480(2)    |        |
| H7B  | 2i | 1 | 0.29980   | 0.42060   | 0.33550      | 0.0380 |
| C8B  | 2i | 1 | 0.4675(4) | 0.3453(3) | 0.4079(2)    |        |
| H8B  | 2i | 1 | 0.39030   | 0.31110   | 0.43660      | 0.0340 |
| C9B  | 2i | 1 | 1.0235(3) | 0.2269(3) | 0.5116(2)    |        |
| C10B | 2i | 1 | 1.1818(4) | 0.1898(3) | 0.6447(2)    |        |
| C11B | 2i | 1 | 1.2513(4) | 0.1146(3) | 0.5742(2)    |        |
| H11B | 2i | 1 | 1.33390   | 0.07420   | 0.59730      | 0.0340 |
| C12B | 2i | 1 | 1.1986(4) | 0.0992(3) | 0.4699(2)    |        |
| C13B | 2i | 1 | 1.2316(4) | 0.2113(3) | 0.7591(2)    |        |

|      |    |   |           |             |              |        |
|------|----|---|-----------|-------------|--------------|--------|
| H13D | 2i | 1 | 1.27750   | 0.29960     | 0.80300      | 0.0640 |
| H13E | 2i | 1 | 1.32090   | 0.16810     | 0.77380      | 0.0640 |
| H13F | 2i | 1 | 1.12900   | 0.18030     | 0.77540      | 0.0640 |
| C14B | 2i | 1 | 1.2658(4) | 0.0195(3)   | 0.3874(2)    |        |
| H14D | 2i | 1 | 1.18980   | 0.00290     | 0.31690      | 0.0560 |
| H14E | 2i | 1 | 1.26750   | -0.05830    | 0.39480      | 0.0560 |
| H14F | 2i | 1 | 1.38390   | 0.06170     | 0.39660      | 0.0560 |
| N1A  | 2i | 1 | 0.3478(3) | 0.7055(2)   | 0.02056(16)  |        |
| N2A  | 2i | 1 | 0.2631(3) | 0.8114(2)   | -0.08278(16) |        |
| N3A  | 2i | 1 | 0.5585(3) | 0.7959(2)   | -0.03427(16) |        |
| N1B  | 2i | 1 | 0.8972(3) | 0.2846(2)   | 0.47528(16)  |        |
| N2B  | 2i | 1 | 1.0810(3) | 0.1559(2)   | 0.43747(17)  |        |
| N3B  | 2i | 1 | 1.0660(3) | 0.2479(2)   | 0.61308(17)  |        |
| O1A  | 2i | 1 | 0.2907(3) | 0.8575(2)   | 0.15381(16)  |        |
| O2A  | 2i | 1 | 0.3588(3) | 0.51591(18) | -0.09457(14) |        |
| O1B  | 2i | 1 | 1.0503(2) | 0.3835(2)   | 0.39670(15)  |        |
| O2B  | 2i | 1 | 0.6735(3) | 0.2082(2)   | 0.52737(16)  |        |

**Table S3** Anisotropic displacement parameters for **NA-N**.

| Atom | U <sub>11</sub> | U <sub>22</sub> | U <sub>33</sub> | U <sub>12</sub> | U <sub>13</sub> | U <sub>23</sub> |
|------|-----------------|-----------------|-----------------|-----------------|-----------------|-----------------|
| C1   | 0.013(3)        | 0.018(3)        | 0.021(3)        | -0.002(2)       | 0.003(2)        | -0.001(3)       |
| C2   | 0.016(3)        | 0.021(3)        | 0.018(3)        | -0.002(2)       | 0.004(2)        | 0.003(2)        |
| C3   | 0.016(3)        | 0.020(3)        | 0.016(3)        | -0.004(2)       | 0.004(2)        | -0.001(2)       |
| C4   | 0.022(3)        | 0.016(3)        | 0.024(3)        | 0.002(2)        | 0.003(3)        | 0.002(2)        |
| C5   | 0.031(3)        | 0.017(3)        | 0.033(4)        | -0.001(3)       | 0.003(3)        | -0.006(3)       |
| C6   | 0.022(3)        | 0.026(3)        | 0.023(3)        | -0.006(3)       | -0.001(3)       | -0.009(3)       |
| C7   | 0.018(3)        | 0.020(3)        | 0.018(3)        | -0.003(2)       | 0.004(2)        | -0.002(3)       |
| C8   | 0.020(3)        | 0.030(3)        | 0.020(3)        | 0.000(3)        | -0.004(3)       | -0.002(3)       |
| C9   | 0.026(3)        | 0.026(3)        | 0.025(3)        | 0.003(3)        | -0.004(3)       | 0.004(3)        |
| C10  | 0.023(3)        | 0.016(3)        | 0.024(3)        | 0.001(2)        | -0.002(3)       | -0.005(2)       |
| C11  | 0.017(3)        | 0.020(3)        | 0.013(3)        | -0.003(2)       | 0.000(2)        | -0.001(2)       |
| C12  | 0.013(3)        | 0.013(3)        | 0.019(3)        | -0.003(2)       | 0.003(2)        | 0.000(2)        |
| C13  | 0.016(3)        | 0.020(3)        | 0.023(3)        | -0.002(2)       | -0.003(2)       | 0.001(2)        |
| C14  | 0.017(3)        | 0.017(3)        | 0.027(3)        | -0.003(2)       | 0.002(2)        | 0.000(3)        |
| C15  | 0.012(3)        | 0.020(3)        | 0.018(3)        | 0.001(2)        | 0.000(2)        | -0.005(3)       |
| C16  | 0.017(3)        | 0.022(3)        | 0.017(3)        | 0.002(2)        | 0.001(2)        | 0.000(2)        |
| C17  | 0.019(3)        | 0.017(3)        | 0.022(3)        | -0.004(2)       | 0.002(2)        | -0.005(2)       |
| C18  | 0.021(3)        | 0.031(3)        | 0.019(3)        | 0.000(3)        | -0.001(3)       | -0.004(3)       |
| C19  | 0.024(3)        | 0.027(3)        | 0.019(3)        | -0.001(3)       | -0.004(2)       | 0.002(3)        |
| N1   | 0.018(2)        | 0.018(2)        | 0.014(2)        | -0.0040(19)     | -0.0054(19)     | -0.0041(19)     |
| N2   | 0.021(3)        | 0.025(3)        | 0.014(2)        | 0.001(2)        | -0.002(2)       | -0.004(2)       |
| N3   | 0.023(3)        | 0.030(3)        | 0.029(3)        | -0.005(2)       | 0.000(2)        | -0.006(3)       |
| O1   | 0.025(2)        | 0.021(2)        | 0.022(2)        | -0.0013(18)     | 0.0006(17)      | -0.0069(18)     |
| O2   | 0.037(2)        | 0.026(2)        | 0.020(2)        | -0.004(2)       | -0.0071(19)     | 0.0055(18)      |
| O3   | 0.039(2)        | 0.024(2)        | 0.028(2)        | -0.009(2)       | 0.0030(19)      | 0.000(2)        |
| O4   | 0.064(3)        | 0.043(3)        | 0.026(2)        | -0.028(3)       | -0.009(2)       | -0.010(2)       |
| O5   | 0.028(2)        | 0.023(2)        | 0.022(2)        | 0.0038(19)      | -0.0066(17)     | 0.003(2)        |

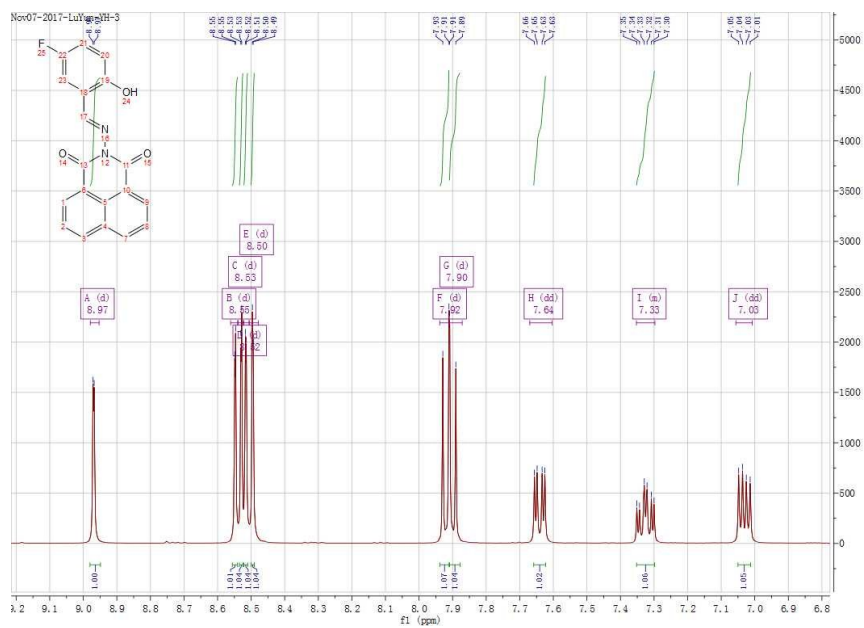

**Fig. S1.** The  $^1\text{H}$  NMR spectrum of NA-F.

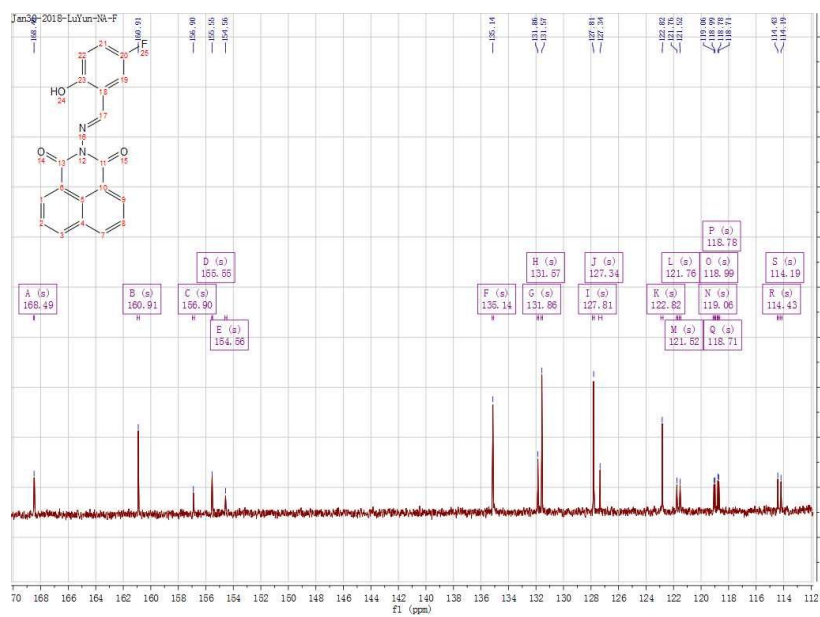

**Fig. S2.** The  $^{13}\text{C}$  NMR spectrum of NA-F.



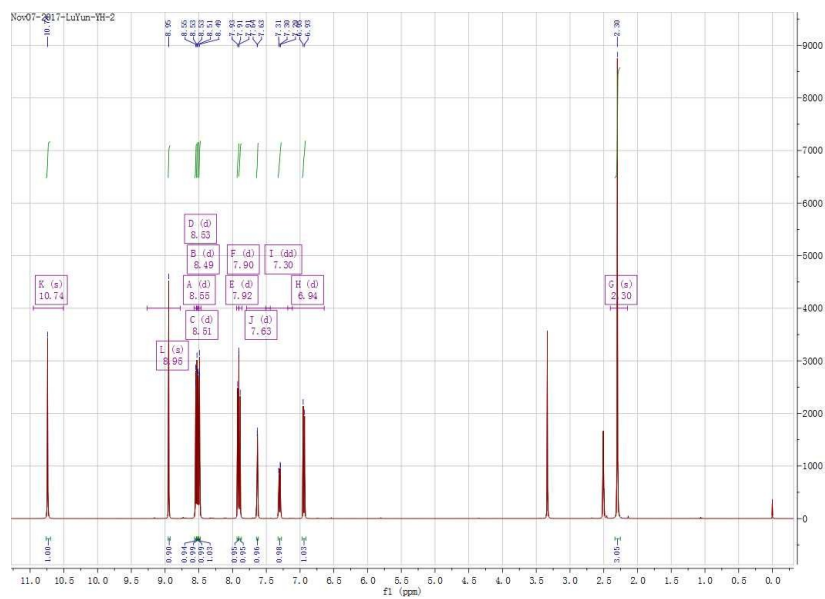

**Fig. S3.** The  $^1\text{H}$  NMR spectrum of NA-M.

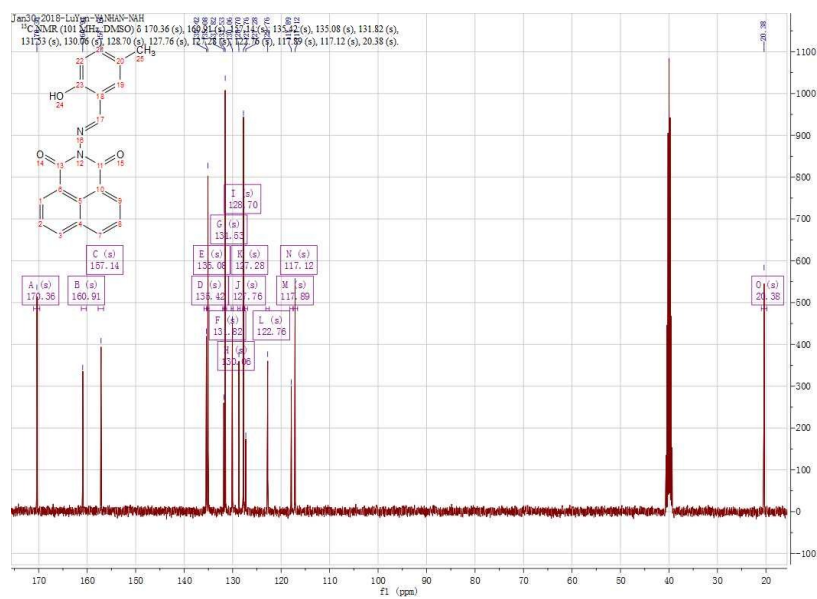

**Fig. S4.** The  $^{13}\text{C}$  NMR spectrum of NA-M.

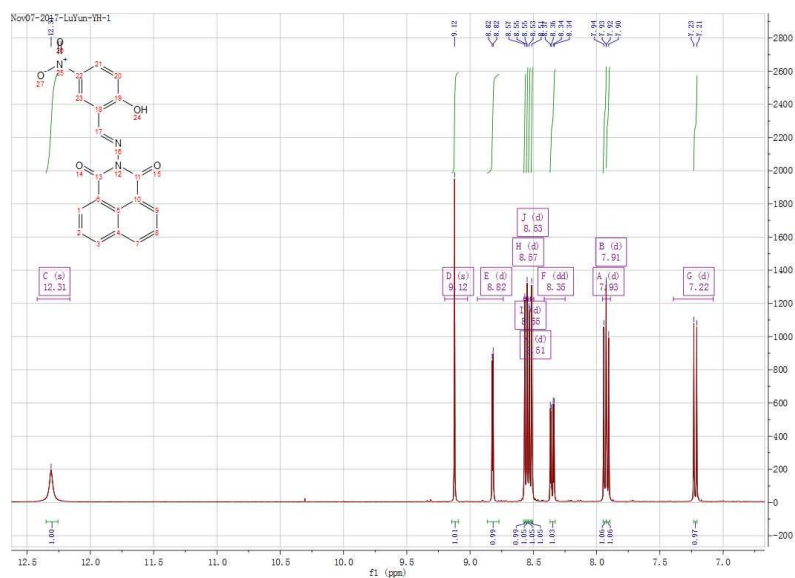

**Fig. S5.** The  $^1\text{H}$  NMR spectrum of NA-N.

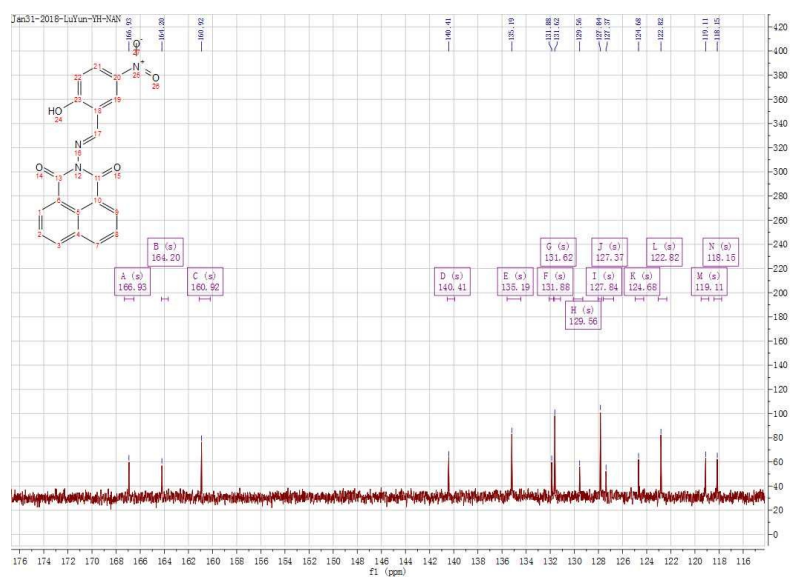

**Fig. S6.** The  $^{13}\text{C}$  NMR spectrum of NA-N.

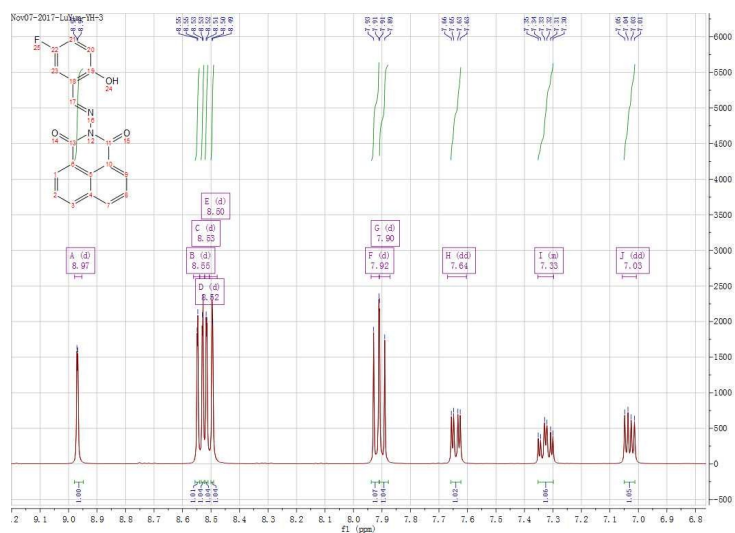

**Fig. S7.** The  $^1\text{H}$  NMR spectrum of NA-EF.

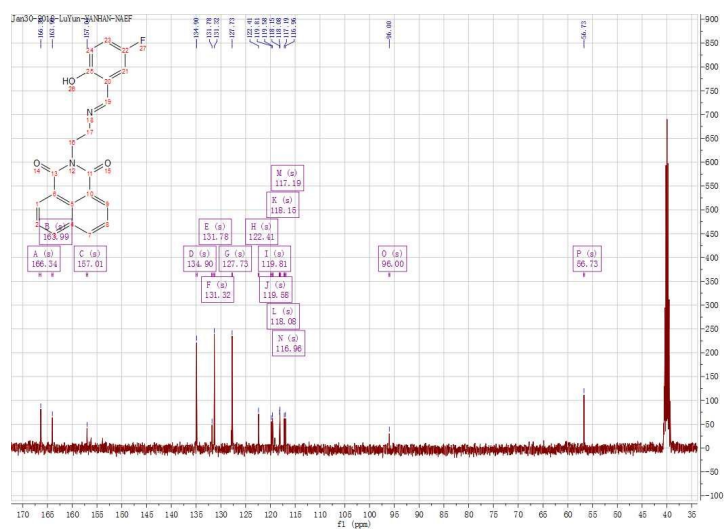

**Fig. S8.** The  $^{13}\text{C}$  NMR spectrum of NA-EF.

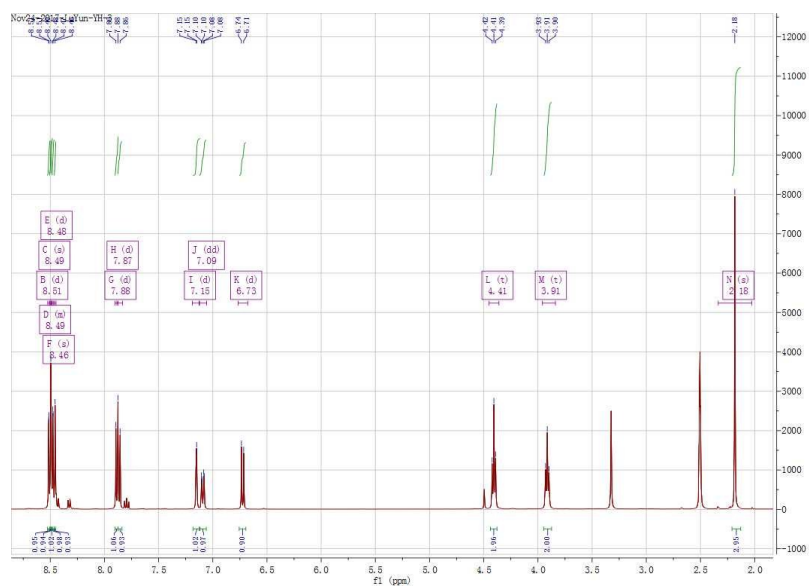

**Fig. S9.** The  $^1\text{H}$  NMR spectrum of NA-EM.

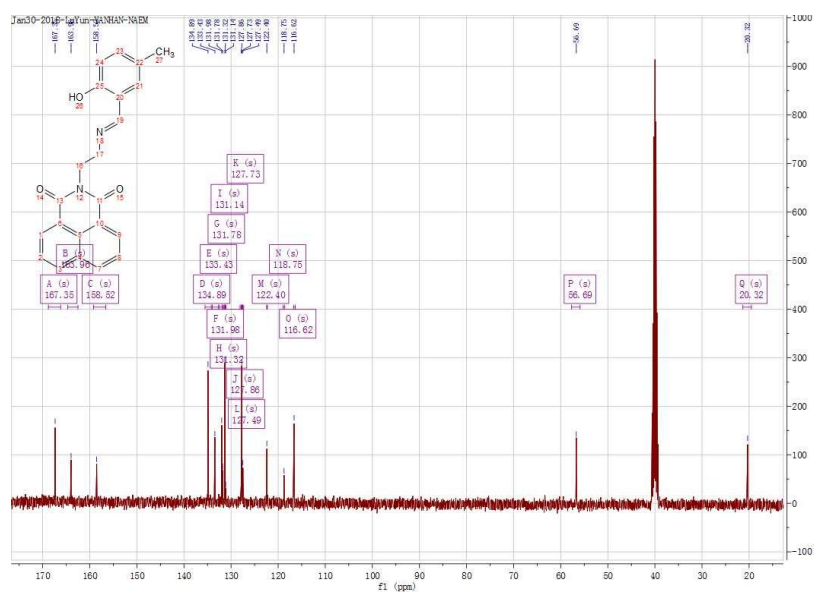

**Fig. S10.** The  $^{13}\text{C}$  NMR spectrum of NA-EM.

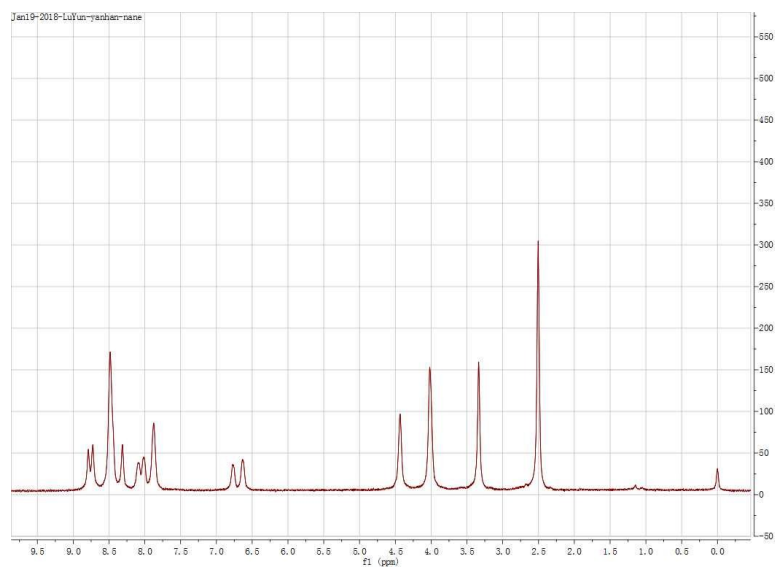

**Fig. S11.** The  $^1\text{H}$  NMR spectrum of NA-EN.

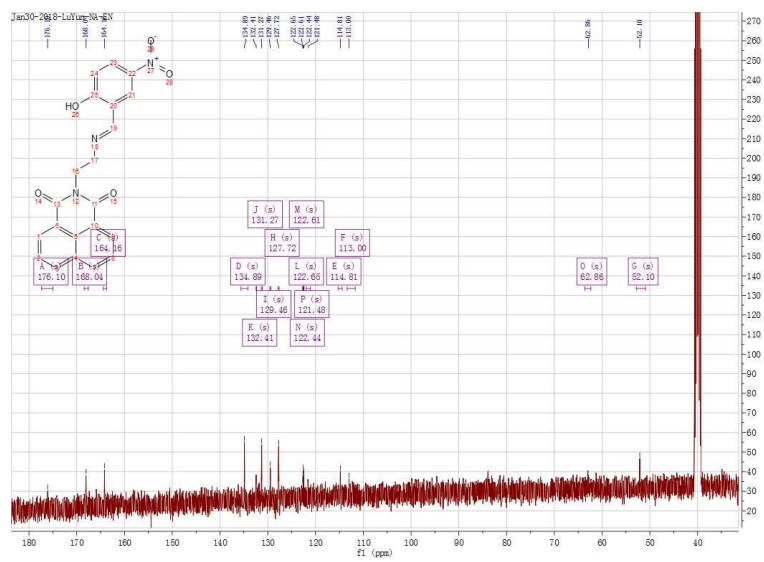

**Fig. S12.** The  $^{13}\text{C}$  NMR spectrum of NA-EN.
